# Supplementary material for: Fabrication and investigation of high-quality glass-ceramic (GC)–polymethyl methacrylate (PMMA) composite for regenerative medicine
Source: Royal Society of Chemistry journal article supplement (doi:10.1039/c7ra05188c), 2017-01-01
Supplement: c7ra05188c1.pdf [file c7ra05188c1.pdf]

**Supportive info:**

**Table S1.** Values of diameter, height, mass and compressive strength for GC-PMMA composites. FE-SEM micrographs showing the surface of the pellets: (a) neat PMMA, ((b) and (c)) GC(75%)-PMMA(25%) composites, and (d) GC(95%)-PMMA(5%) composite.

| Sample (BG/PMMA)   | Diameter, mm | Height mm | Mass (m), g | Density ( $\rho$ ), kg/m <sup>3</sup> | Strength, MPa | Strength at $\rho=1900\text{kg/m}^3$ , MPa |
|--------------------|--------------|-----------|-------------|---------------------------------------|---------------|--------------------------------------------|
| 75/25 (I)          | 8            | 4.53      | 0.444       | 1951                                  | 49.77         | 47.21                                      |
| 75/25 (II)         | 8            | 4.14      | 0.403       | 1938                                  | 50.5          | 48.56                                      |
| 75/25 (III)        | 8            | 4.36      | 0.429       | 1958                                  | 48.63         | 45.77                                      |
| Average:           |              |           |             | <b>1949</b>                           | <b>49.63</b>  | <b>47.18</b>                               |
| Standard deviation |              |           |             | 11                                    | 0.94          | 1.40                                       |
| 85/15 (I)          | 8            | 5.38      | 0.518       | 1916                                  | 47.57         | 46.76                                      |
| 85/15 (II)         | 8            | 5.27      | 0.508       | 1919                                  | 48.67         | 47.73                                      |
| 85/15 (III)        | 8            | 5.28      | 0.509       | 1919                                  | 50.1          | 49.12                                      |
| Average:           |              |           |             | <b>1918</b>                           | <b>48.78</b>  | <b>47.87</b>                               |
| Standard deviation |              |           |             | 1                                     | 1.27          | 1.19                                       |
| 90/10 (I)          | 8            | 5.39      | 0.507       | 1872                                  | 48.01         | 49.44                                      |
| 90/10 (II)         | 8            | 5.47      | 0.511       | 1859                                  | 42.81         | 44.70                                      |
| 90/10 (III)        | 8            | 5.43      | 0.51        | 1869                                  | 48.29         | 49.88                                      |
| 90/10 (IV)         | 8            | 5.4       | 0.509       | 1876                                  | 50            | 51.28                                      |
| Average:           |              |           |             | <b>1869</b>                           | <b>47.28</b>  | <b>48.82</b>                               |
| Standard deviation |              |           |             | 7                                     | 3.11          | 2.86                                       |
| 95/5 (I)           | 8            | 5.21      | 0.493       | 1883                                  | 40.51         | 41.22                                      |
| 95/5 (II)          | 8            | 5.21      | 0.497       | 1899                                  | 42.33         | 42.39                                      |
| 95/5 (III)         | 8            | 5.19      | 0.486       | 1864                                  | 43.14         | 44.83                                      |
| 95/5 (VI)          | 8            | 5.42      | 0.513       | 1884                                  | 43.8          | 44.55                                      |
| Average:           |              |           |             | <b>1883</b>                           | <b>42.45</b>  | <b>43.25</b>                               |
| Standard deviation |              |           |             | 14                                    | 1.42          | 1.74                                       |

**Figure captions:**

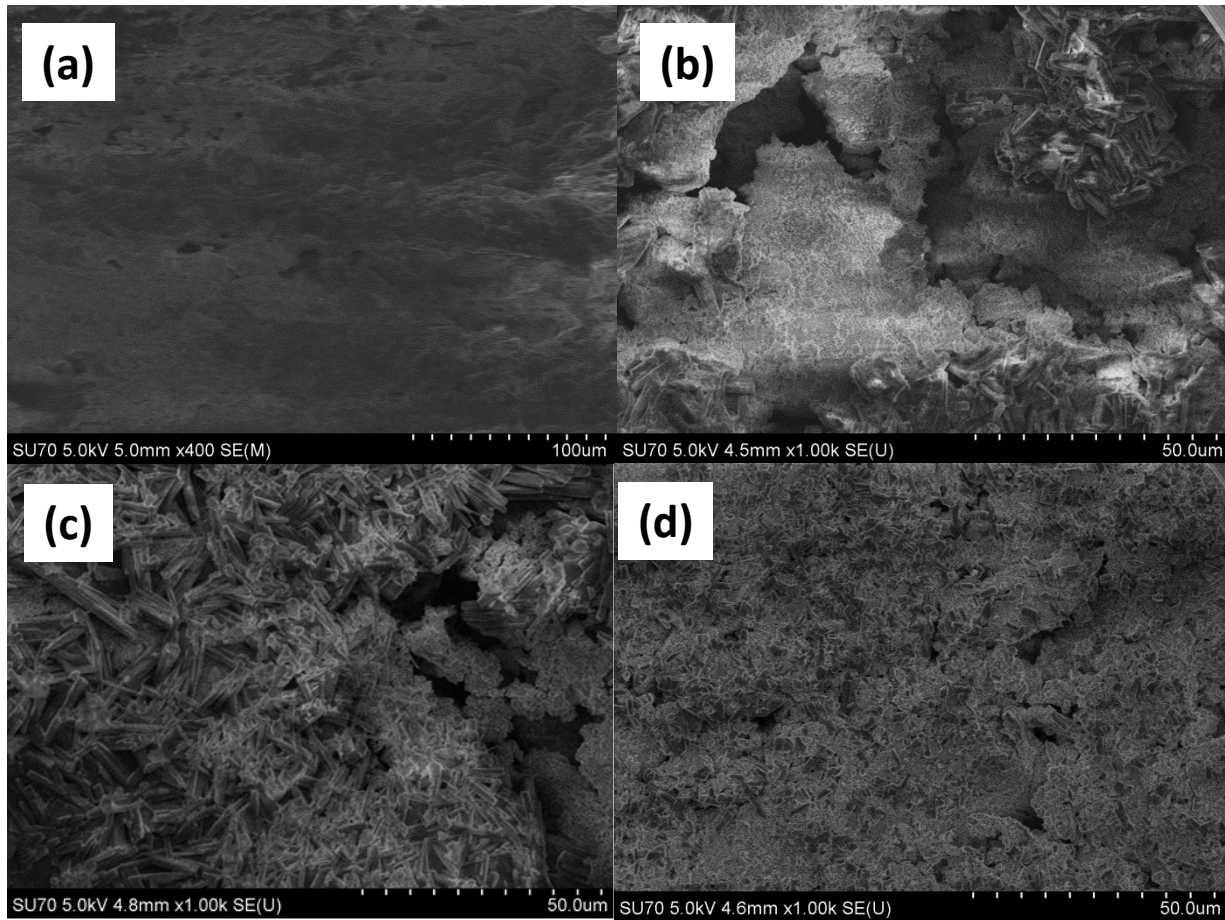

**ESI Fig S1.** FE-SEM micrographs showing the surface of the pellets: (a) neat PMMA, ((b) and (c)) GC(75%)-PMMA(25%) composites, and (d) GC(95%)-PMMA(5%) composite.

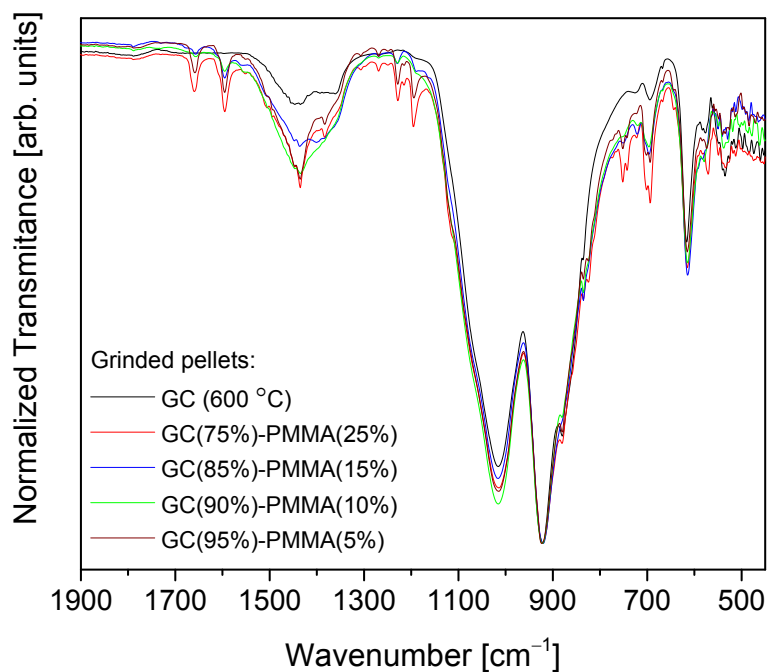

**ESI Fig S2.** FTIR spectra of GC (annealed at 600 °C) and grinded GC-PMMA composite pellets.

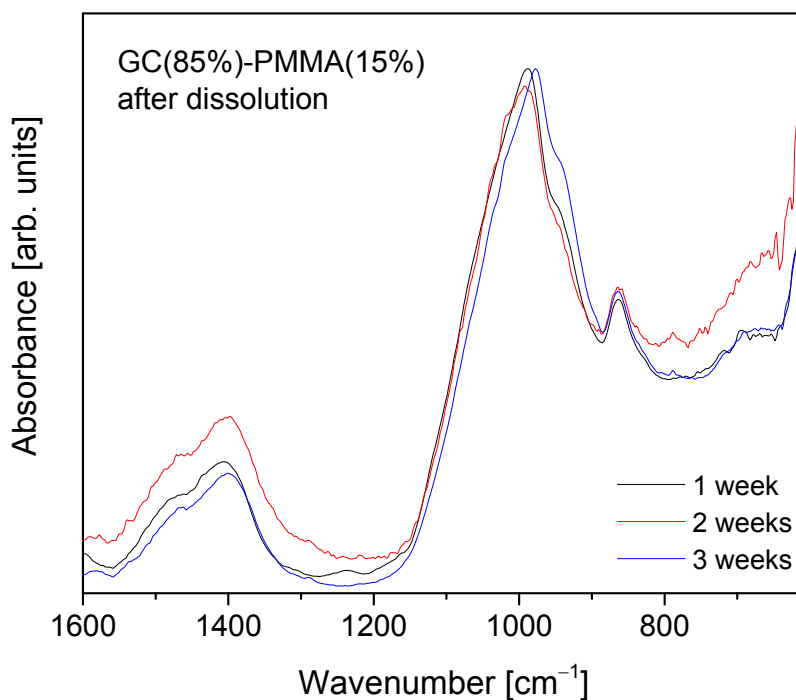

**ESI Fig. S3.** Absorption FTIR spectra recoded from the surface of GC(85%)-PMMA(15%) composite pellets 1, 2 and 3 weeks after the dissolution in SBF.
